# Supplementary material
Source: PubMed Central journal article supplement (PMC4371404)
Supplement: supp_WNL.0000000000001371_Supplemental_data.pdf [file supp_WNL.0000000000001371_Supplemental_data.pdf]

ONLINE SUPPLEMENT

**Sleep Duration and Risk of Fatal and Non-fatal Stroke: a Prospective Study  
and Meta-analysis**

Appendix e-1

**Search strategy for the systematic review, adapted from previous systematic review <sup>1</sup>**

We searched Ovid Medline, EMBASE (from 1980 to May 2014) and the Cochrane Library using a combination of the following key words

1. Sleep/ or sleep.mp.
2. sleep duration.mp.
3. ischemic.mp.
4. ischaemic.mp.
5. hemorrhagic.mp.
6. haemorrhagic.mp.
7. stroke.mp. or Stroke/
8. 3 or 4 or 5 or 6
9. 7 and 8
10. cerebrovascular accident.mp.
11. cerebrovascular disorders.mp. or Cerebrovascular Disorders/
12. cerebral infarction.mp. or Cerebral Infarction/
13. cerebral hemorrhage.mp. or Cerebral Hemorrhage/
14. cerebral haemorrhage.mp.
15. cardiovascular disease.mp. or Cardiovascular Diseases/
16. 10 or 11 or 12 or 13 or 14 or 15
17. 1 or 2
18. 7 or 9 or 16
19. 17 and 18

**Flow chart of literature selection**

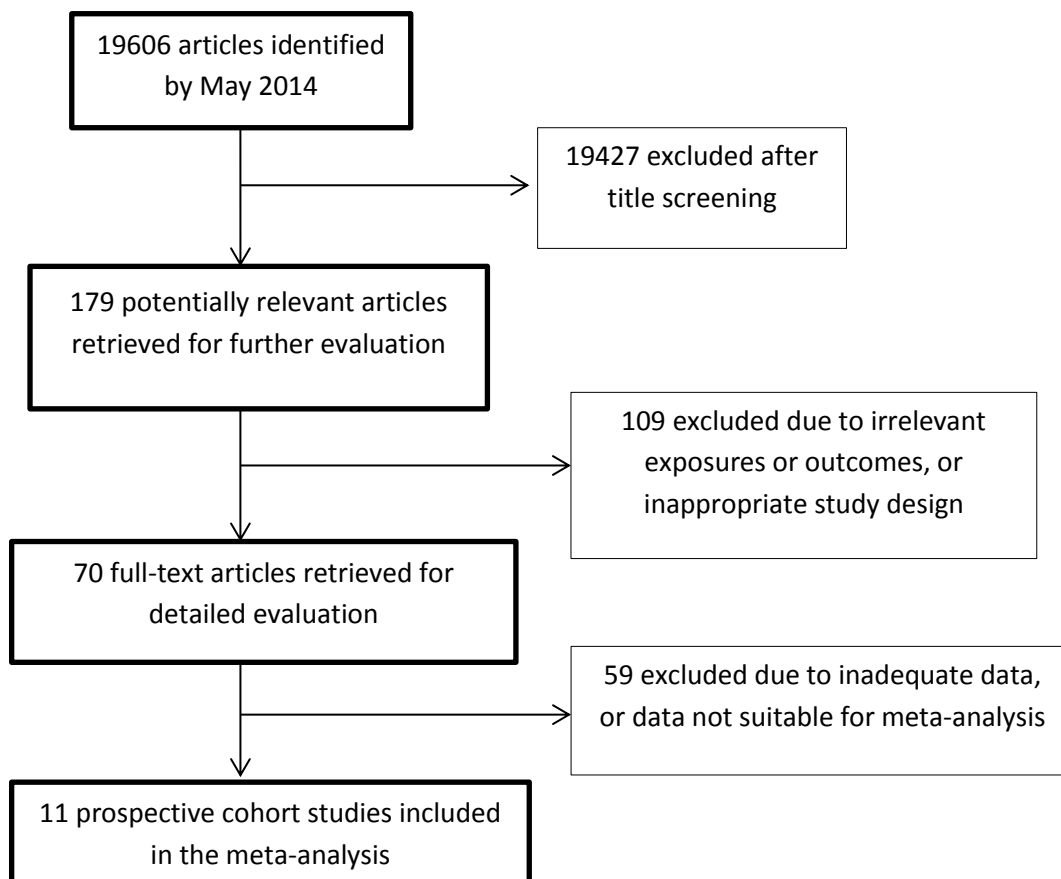

Table e-1 Hazard ratios (95% CI) of sleep duration for the risk of fatal and non-fatal stroke

|           |           | Number<br>of events | <6h  |             | 6-8h     | >8h   |             |
|-----------|-----------|---------------------|------|-------------|----------|-------|-------------|
|           |           |                     | HR   | 95%CI       | Referent | HR    | 95%CI       |
| Non-fatal |           |                     |      |             |          |       |             |
| All       |           | 300                 |      |             |          |       |             |
|           | † Model 1 |                     | 1.11 | [0.84,1.47] | 1.00     | 1.39  | [1.00,1.93] |
|           | ‡ Model 2 |                     | 1.10 | [0.83,1.46] | 1.00     | 1.38  | [1.00,1.92] |
|           | § Model 3 |                     | 1.11 | [0.84,1.47] | 1.00     | 1.39  | [1.00,1.93] |
| Men       |           | 180                 |      |             |          |       |             |
|           | † Model 1 |                     | 1.13 | [0.77,1.64] | 1.00     | 1.27  | [0.83,1.94] |
|           | ‡ Model 2 |                     | 1.05 | [0.72,1.55] | 1.00     | 1.27  | [0.83,1.94] |
|           | § Model 3 |                     | 1.06 | [0.73,1.57] | 1.00     | 1.24  | [0.81,1.90] |
| Women     |           | 120                 |      |             |          |       |             |
|           | † Model 1 |                     | 1.10 | [0.73,1.68] | 1.00     | 1.60  | [0.95,2.69] |
|           | ‡ Model 2 |                     | 1.16 | [0.76,1.77] | 1.00     | 1.57  | [0.93,2.64] |
|           | § Model 3 |                     | 1.14 | [0.75,1.75] | 1.00     | 1.58  | [0.93,2.67] |
| Fatal     |           |                     |      |             |          |       |             |
| All       |           | 67                  |      |             |          |       |             |
|           | † Model 1 |                     | 1.28 | [0.72,2.26] | 1.00     | 1.81  | [0.95,3.48] |
|           | ‡ Model 2 |                     | 1.27 | [0.71,2.26] | 1.00     | 1.88  | [0.98,3.63] |
|           | § Model 3 |                     | 1.30 | [0.73,2.32] | 1.00     | 1.88  | [0.97,3.64] |
| Men       |           | 32                  |      |             |          |       |             |
|           | † Model 1 |                     | 1.01 | [0.41,2.50] | 1.00     | 0.99  | [0.34,2.89] |
|           | ‡ Model 2 |                     | 0.98 | [0.39,2.46] | 1.00     | 1.06  | [0.36,3.13] |
|           | § Model 3 |                     | 0.97 | [0.38,2.48] | 1.00     | 1.02  | [0.34,3.05] |
| Women     |           | 35                  |      |             |          |       |             |
|           | † Model 1 |                     | 1.57 | [0.73,3.36] | 1.00     | 3.07* | [1.30,7.26] |
|           | ‡ Model 2 |                     | 1.48 | [0.67,3.25] | 1.00     | 3.14* | [1.31,7.49] |
|           | § Model 3 |                     | 1.58 | [0.71,3.51] | 1.00     | 2.64* | [1.07,6.51] |

\*<0.05

† adjusted for age, sex.

‡ adjusted for † plus social class, education, marital status, smoking, alcohol intake, hypnotic drug use, family history of stroke.

§ adjusted for ‡ plus BMI, physical activity, depression, systolic blood pressure, diastolic blood pressure, pre-existing diabetes and myocardial infarction, cholesterol level, hypertension drug use

Table e-2 Hazard ratios (95% CI)\* of sleep duration for the risk of stroke, by subgroups

| Subgroups            | Number | No. of events | <6h  |              | 6-8h | >8h  |              | p for interaction |
|----------------------|--------|---------------|------|--------------|------|------|--------------|-------------------|
| Follow up length     |        |               |      |              |      |      |              | 0.42              |
| Follow up<31/12/2004 | 515    | 112           | 1    | [0.62,1.62]  | 1    | 1.12 | [0.65,1.95]  |                   |
| Follow up>1/1/2005   | 9177   | 234           | 1.11 | [0.81,1.53]  | 1    | 1.30 | [0.89,1.91]  |                   |
| Age                  |        |               |      |              |      |      |              | 0.98              |
| <63                  | 5203   | 43            | 1.87 | [0.97,3.60]  | 1    | 0.92 | [0.28,3.07]  |                   |
| ≥63                  | 4489   | 303           | 1.09 | [0.82,1.44]  | 1    | 1.50 | [1.09,2.05]  |                   |
| BMI                  |        |               |      |              |      |      |              | 0.77              |
| 14.4-26.1            | 4846   | 163           | 1.28 | [0.88,1.88]  | 1    | 1.51 | [0.97,2.37]  |                   |
| 26.1-51.6            | 4846   | 183           | 1.07 | [0.75,1.54]  | 1    | 1.41 | [0.93,2.13]  |                   |
| Physical activity    |        |               |      |              |      |      |              | 0.11              |
| Inactive             | 5295   | 230           | 1.18 | [0.86,1.63]  | 1    | 1.64 | [1.14,2.36]  |                   |
| Active               | 4397   | 116           | 1.11 | [0.70,1.74]  | 1    | 1.17 | [0.67,2.04]  |                   |
| Alcohol intake       |        |               |      |              |      |      |              | 0.44              |
| 0.5-5                | 5037   | 171           | 1.14 | [0.80,1.63]  | 1    | 1.28 | [0.80,2.06]  |                   |
| 5.5-120              | 4655   | 175           | 1.21 | [0.83,1.77]  | 1    | 1.63 | [1.08,2.44]  |                   |
| Smoking status       |        |               |      |              |      |      |              | 0.75              |
| Current              | 742    | 35            | 1.69 | [0.72,3.96]  | 1    | 1.65 | [0.63,4.30]  |                   |
| Former               | 4241   | 188           | 1.2  | [0.85,1.71]  | 1    | 1.42 | [0.93,2.17]  |                   |
| Never smoked         | 4709   | 123           | 1.04 | [0.66,1.62]  | 1    | 1.43 | [0.86,2.38]  |                   |
| MDD                  |        |               |      |              |      |      |              | 0.13              |
| Yes                  | 441    | 15            | 0.71 | [0.20,2.60]  | 1    | 0.53 | [0.06,4.88]  |                   |
| No                   | 9251   | 331           | 1.18 | [0.91,1.55]  | 1    | 1.52 | [1.12,2.07]  |                   |
| Hypertension drug    |        |               |      |              |      |      |              | 0.49              |
| Yes                  | 2039   | 141           | 1.42 | [0.97,2.09]  | 1    | 1.57 | [0.96,2.58]  |                   |
| No                   | 7653   | 205           | 0.95 | [0.67,1.37]  | 1    | 1.43 | [0.97,2.12]  |                   |
| Cholesterol level    |        |               |      |              |      |      |              | 0.8               |
| 2.2-6                | 5042   | 169           | 1.15 | [0.79,1.67]  | 1    | 1.58 | [1.02,2.45]  |                   |
| 6.1-14.4             | 4650   | 177           | 1.16 | [0.81,1.68]  | 1    | 1.39 | [0.91,2.13]  |                   |
| CRP                  |        |               |      |              |      |      |              | 0.2               |
| <1                   | 2851   | 73            | 1.24 | [0.70,2.20]  | 1    | 1.59 | [0.83,3.06]  |                   |
| 1~3                  | 2748   | 109           | 1.70 | [1.10,2.64]  | 1    | 1.62 | [0.92,2.85]  |                   |
| >3                   | 1677   | 75            | 0.72 | [0.40,1.31]  | 1    | 0.94 | [0.44,1.99]  |                   |
| Preexisting diabetes |        |               |      |              |      |      |              | 0.2               |
| Yes                  | 254    | 12            | 4.96 | [0.99,24.76] | 1    | 3.20 | [0.41,24.91] |                   |
| No                   | 9438   | 334           | 1.11 | [0.85,1.45]  | 1    | 1.42 | [1.04,1.94]  |                   |
| Preexisting MI       |        |               |      |              |      |      |              | 0.65              |
| Yes                  | 293    | 29            | 0.97 | [0.36,2.63]  | 1    | 1.08 | [0.35,3.31]  |                   |
| No                   | 9399   | 317           | 1.16 | [0.88,1.52]  | 1    | 1.48 | [1.08,2.03]  |                   |
| Sleep well           |        |               |      |              |      |      |              | 0.01              |
| Yes                  | 7574   | 264           | 1.58 | [1.11,2.25]  | 1    | 1.64 | [1.20,2.24]  |                   |
| No                   | 1783   | 66            | 0.67 | [0.40,1.14]  | 1    | 0.80 | [0.11,6.04]  |                   |
| Subtypes of stroke   |        |               |      |              |      |      |              |                   |
| Ischaemic            | 9692   | 136           | 1.45 | [0.97,2.15]  | 1    | 1.27 | [0.76,2.12]  |                   |
| Haemorrhagic         | 9692   | 75            | 0.90 | [0.49,1.64]  | 1    | 1.70 | [0.92,3.15]  |                   |
| Unspecified          | 9692   | 230           | 1.08 | [0.78,1.49]  | 1    | 1.45 | [1.00,2.11]  |                   |

\* Adjusted for age, sex, social class, education, marital status, smoking, alcohol intake, hypnotic drug use, family history of stroke. BMI: Body Mass Index; MI: Myocardial Infarction.

Table e-3 Summary of studies included in the meta-analysis

| Author (Year)                | Sex   | Country | age at baseline | Events/ Participants | Follow up(years) | Sleep category | Outcome         | Adjusted variables                                                                                                                                                                                                                                                                    |
|------------------------------|-------|---------|-----------------|----------------------|------------------|----------------|-----------------|---------------------------------------------------------------------------------------------------------------------------------------------------------------------------------------------------------------------------------------------------------------------------------------|
| Amagai (2004) <sup>2</sup>   | Both  | Japan   | 40-69           | 63/11,325            | 8.2              | <6h/≥9h        | fatal           | Age, BMI, education, marital status, smoking, alcohol consumption, SBP, total cholesterol                                                                                                                                                                                             |
| Chen (2008) <sup>3</sup>     | Women | USA     | 50-79           | 1166/93,175          | 7.5              | ≤5h/≥10h       | fatal+non-fatal | Age, race, socio-economic status, depression, smoking, exercise, hormone replacement, previous CVD, diabetes, hypertension, BMI, high cholesterol                                                                                                                                     |
| Hamazaki (2011) <sup>4</sup> | Men   | Japan   | 35-54           | 30/2282              | 14.0             | <6h/≥8h        | fatal+non-fatal | Age, type of job, working hours, mental workload, body mass index, SBP, HbA1c, total cholesterol, current smoking habit, drinking habit, leisure– time physical activity , medication for hypertension and diabetes, hypercholesterolemia                                             |
| Ikehara (2009) <sup>5</sup>  | Both  | Japan   | 40-79           | 1964/98,634          | 14.3             | ≤4h/>10h       | fatal           | Age,BMI, history of hypertension, diabetes, alcohol consumption, smoking, education, hours of exercise and walking, employment, perceived mental stress, depression, frequency of fresh fish intake                                                                                   |
| Kakizaki (2013) <sup>6</sup> | Both  | Japan   | 40-79           | 1165/49,256          | 10.8             | ≤6h/≥10h       | fatal           | Age, sex, total caloric intake, BMI, marital status, education, job status, history of myocardial infarction, cancer, stroke, hypertension and diabetes mellitus, smoking status, alcohol drinking, time spent walking, perceived mental stress, self-rated health, physical function |
| Kim (2013) <sup>7</sup>      | Both  | USA     | 45-75           | 1259/135,685         | 12.9             | ≤5h/≥9h        | fatal           | Age, ethnicity, education, marital status, history of hypertension or diabetes at enrollment, alcohol consumption, energy intake, BMI, physical activity, hours spent daily watching television, smoking history                                                                      |

|                                  |      |           |              |             |      |          |                 |                                                                                                                                                                                                                                                                                                                        |
|----------------------------------|------|-----------|--------------|-------------|------|----------|-----------------|------------------------------------------------------------------------------------------------------------------------------------------------------------------------------------------------------------------------------------------------------------------------------------------------------------------------|
| Kronholm (2011) <sup>8</sup>     | Both | Finland   | 25-59        | 2182/22484  | 35.0 | ≤5h/≥10h | fatal+non-fatal | Age, smoking, BMI, SBP, total cholesterol                                                                                                                                                                                                                                                                              |
| Leng (2014)                      | Both | UK        | mean: 61.6   | 346/9692    | 9.5  | <6h/>8h  | fatal+non-fatal | Age, sex, social class, education, marital status, smoking, alcohol intake, family history of stroke, BMI, physical activity, depression, hypnotic drug use, systolic blood pressure, pre-existing diabetes, MI, cholesterol level, hypertension drug use                                                              |
| Pan (2014) <sup>9</sup>          | Both | Singapore | 45-74        | 1381/63257  | 14.7 | ≤5h/≥9h  | fatal           | Age, year of recruitment, sex, dialect group, education, BMI, alcohol intake, smoking status, physical activity, daily intake of total energy, vegetables, fruits, dietary fiber, and polyunsaturated fatty acids, history of hypertension, diabetes, CHD, stroke, and cancer                                          |
| Qureshi (1997) <sup>10</sup>     | Both | USA       | 31+          | 322/7,844   | 10.0 | <6h/>8h  | fatal+non-fatal | Age, sex, race, BMI, education, smoking, SBP, cholesterol, diabetes                                                                                                                                                                                                                                                    |
| Von Ruesten (2012) <sup>11</sup> | Both | Germany   | 35-65        | 169/23,620  | 7.8  | <6h/≥9h  | fatal+non-fatal | Age, sex, sleeping disorders, alcohol intake, smoking status, walking, cycling, sports, employment status, education, BMI, waist-to-hip ratio, prevalent hypertension, history of high blood lipid levels, consumption of caffeinated beverages, satisfaction with life, satisfaction with health, antidepressants use |
| Westerlund (2013) <sup>12</sup>  | Both | Sweden    | median: 52.8 | 1685/41,192 | 13.2 | ≤5h/≥8h  | fatal+non-fatal | Age, sex, education, employment status, smoking, alcohol, snoring, work schedule, depressive symptoms, self-rated health, physical activity, BMI, diabetes, lipid disturbance, hypertension                                                                                                                            |

BMI: Body Mass Index; CHD: Coronary Heart Disease; CVD: Cardiovascular Disease; SBP: Systolic Blood Pressure

## References

1. Cappuccio FP, Cooper D, D'Elia L, Strazzullo P, Miller M a. Sleep duration predicts cardiovascular outcomes: a systematic review and meta-analysis of prospective studies. *Eur Heart J* 2011;32(12):1484–1492.
2. Amagai Y, Ishikawa S, Gotoh T, et al. Sleep duration and mortality in Japan: the Jichi Medical School Cohort Study. *J Epidemiol* 2004;14(4):124–128.
3. Chen J-C, Brunner RL, Ren H, et al. Sleep duration and risk of ischemic stroke in postmenopausal women. *Stroke* 2008;39(12):3185–3192.
4. Hamazaki Y, Morikawa Y, Nakamura K, et al. The effects of sleep duration on the incidence of cardiovascular events among middle-aged male workers in Japan. *Scand J Work Environ Health* 2011;37(5):411–417.
5. Ikehara S, Iso H, Date C, et al. Association of sleep duration with mortality from cardiovascular disease and other causes for Japanese men and women: the JACC study. *Sleep* 2009;32(3):295–301.
6. Kakizaki M, Kuriyama S, Nakaya N, et al. Long sleep duration and cause-specific mortality according to physical function and self-rated health: the Ohsaki Cohort Study. *J Sleep Res* 2013;22(2):209–216.
7. Kim Y, Wilkens LR, Schembre SM, Henderson BE, Kolonel LN, Goodman MT. Insufficient and excessive amounts of sleep increase the risk of premature death from cardiovascular and other diseases: the Multiethnic Cohort Study. *Prev Med* 2013;57(4):377–385.
8. Kronholm E, Laatikainen T, Peltonen M, Sippola R, Partonen T. Self-reported sleep duration, all-cause mortality, cardiovascular mortality and morbidity in Finland. *Sleep Med* 2011;12(3):215–221.
9. Pan A, De Silva DA, Yuan J-M, Koh W-P. Sleep Duration and Risk of Stroke Mortality Among Chinese Adults: Singapore Chinese Health Study. *Stroke* 2014 17;45:1620–1625.
10. Qureshi A, Giles W, Croft J, Bliwise D. Habitual sleep patterns and risk for stroke and coronary heart disease A 10-year follow-up from NHANES I. *Neurology* 1997;48:904–911.
11. Von Ruesten A, Weikert C, Fietze I, Boeing H. Association of sleep duration with chronic diseases in the European Prospective Investigation into Cancer and Nutrition (EPIC)-Potsdam study. *PLoS One* 2012;7(1):e30972.
12. Westerlund A, Bellocco R, Sundström J, Adami H-O, Åkerstedt T, Trolle Lagerros Y. Sleep characteristics and cardiovascular events in a large Swedish cohort. *Eur J Epidemiol* 2013;28(6):463–473.
